# Supplementary material
Source: HighWire-hosted journal article supplement (https://openres.ersjournals.com/content/9/1/00438-2022)
Supplement: inline-supplementary-material-2 [file inline-supplementary-material-2.pdf]

**Supplemental material 2 (SM2) : NIV parameters at initiation**

|                       |                       | <b>Total</b> | <b>Out patients</b> | <b>In patients</b> | <b>P value</b>  |
|-----------------------|-----------------------|--------------|---------------------|--------------------|-----------------|
| <b>NIV Parameters</b> | <b>N</b>              | 265          | 184                 | 81                 |                 |
|                       | IPAP (cmH20)          | 11.9±2.38    | 11.36±1,94          | 13.5±2.79          | <b>&lt;.001</b> |
|                       | EPAP (cmH20)          | 6.44±1.36    | 6.36±1,32           | 6.68±1.46          | 0.108           |
|                       | Back up RR (acts/min) | 13.3±1.32    | 13.07±1,24          | 14.1±1.27          | <b>&lt;.001</b> |
|                       | Rise time (ms)        | 425±132      | 437.91±128,82       | 378±134            | <b>0.004</b>    |
|                       | Trigger (L/min)       | 5.9±0.85     | 5.95±0,47           | 5.72±1.72          | 0.078           |
|                       | Cycling (%IPF)        | 23.8±5.35    | 23.49±4,78          | 25.1±7.54          | 0.096           |
|                       | Ti min (s)            | 0.59±0.14    | 0.59±0,13           | 0.59±0.17          | 0.960           |
|                       | Ti max (s)            | 1.76±0.3     | 1.77±0,28           | 1.71±0.41          | 0.228           |
|                       | Face mask             | 245(100)     | 183(99)             | 62(100)            | 0.561           |

Data are presented as mean±sd and n (%).NIV: noninvasive ventilation; ADH: adherence; IPAP: inspiratory positive airway pressure; EPAP: expiratory positive airway pressure; RR : respiratory rate; IPF: inspiratory peak flow ; Ti: inspiratory time
